# Supplementary material for: Mediation effect analysis of lipoprotein levels on BMI and cardiovascular outcomes in patients with heart failure
Source: PubMed Central journal article supplement — BMC Cardiovasc Disord. 2024 Oct 12;24:553. doi: 10.1186/s12872-024-04155-9 (PMC11470738; doi:10.1186/s12872-024-04155-9), 2024-10-12
Supplement: 12872_2024_4155_MOESM1_ESM.pdf [file 12872_2024_4155_MOESM1_ESM.pdf]

## Supplementary Information

|                                                                                                                                  |   |
|----------------------------------------------------------------------------------------------------------------------------------|---|
| Figure S1 Differences in all-cause death, cardiovascular death and MACCEs across BMI groups .....                                | 2 |
| Table S1 Results of taking the optimal cutoff value according to the Akaike information criterion .....                          | 2 |
| Table S2 Results of Subgroup Cox Regression Analysis According to Median BNP and Glucose .....                                   | 3 |
| Table S3 Results of Subgroup Cox Regression Analyses Based on Median ALT and AST .....                                           | 4 |
| Table S4 Results of Subgroup Cox Regression Analyses According to Comorbid Hyperlipidemia and Statin Use .....                   | 5 |
| Table S5 Results of Cox Regression Analyses after adjusting for other confounders .....                                          | 6 |
| Table S6 Results of mediation effects analysis of TG in different heart failure patients groups .....                            | 6 |
| Table S7 Results of Subgroup Cox Regression Analyses Between HF <sub>r</sub> EF+HF <sub>m</sub> rEF and HF <sub>p</sub> EF ..... | 7 |

**Figure S1** Differences in all-cause death, cardiovascular death and MACCEs across BMI groups

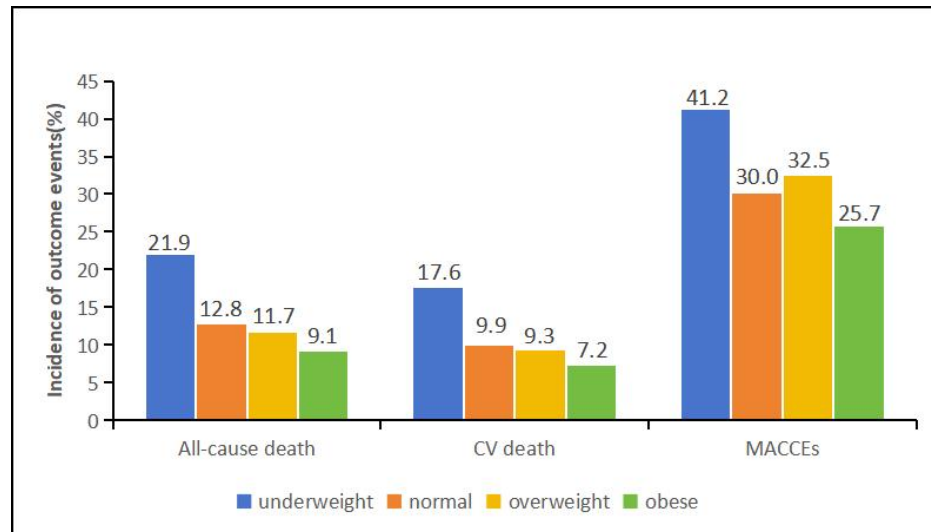

**Table S1** Results of taking the optimal cutoff value according to the Akaike information criterion

| BMI take | Model 1( $\leq$ BMI take) | Model 2( $>$ BMI take) | Model 1+Model 2 |
|----------|---------------------------|------------------------|-----------------|
| 23.5     | 2691.698                  | 3759.732               | 6451.430        |
| 24.0     | 2949.311                  | 3489.725               | 6439.036        |
| 24.5     | 3449.670                  | 2992.221               | 6441.891        |
| 25.0     | 3894.371                  | 2562.900               | 6457.271        |
| 25.5     | 4359.095                  | 2134.861               | 6493.956        |

Based on the Akaike information criterion, combined with the RCS curve, BMI was taken to be 23.5, 24, 24.5, 25, and 25.5, respectively, and these values divided the Cox regression model into two ( $\leq$ BMI take and  $>$ BMI take). The sum of the -2 log-likelihoods of model 1 + model 2 was calculated based on the -2 log-likelihoods of the two models, respectively, with the BMI take at the lowest time being the best cutoff value.

**Table S2** Results of Subgroup Cox Regression Analysis According to Median BNP and Glucose

| Outcomes        | Group       | BNP≤347 pg/mg (n=832) |         | BNP > 347 pg/mg (n=831) |         | Glu≤4.95 mmol/L (n=847) |         | Glu > 4.95 mmol/L (n=816) |         |
|-----------------|-------------|-----------------------|---------|-------------------------|---------|-------------------------|---------|---------------------------|---------|
|                 |             | HR(95%CI)             | p Value | HR(95%CI)               | p Value | HR(95%CI)               | p Value | HR(95%CI)                 | p Value |
| All-cause death | underweight | Reference             |         | Reference               |         | Reference               |         | Reference                 |         |
|                 | Nomal       | 0.54<br>(0.34,0.85)   | 0.007   | 0.57<br>(0.34,0.97)     | 0.039   | 0.73<br>(0.45,1.17)     | 0.194   | 0.37<br>(0.22,0.62)       | <0.001  |
|                 | Overweight  | 0.50<br>(0.31,0.80)   | 0.004   | 0.52<br>(0.30,0.89)     | 0.018   | 0.50<br>(0.30,0.84)     | 0.009   | 0.46<br>(0.28,0.76)       | 0.002   |
|                 | obese       | 0.44<br>(0.25,0.78)   | 0.005   | 0.52<br>(0.29,0.93)     | 0.027   | 0.54<br>(0.31,0.93)     | 0.027   | 0.34<br>(0.19,0.62)       | <0.001  |
| CV death        | underweight | Reference             |         | Reference               |         | Reference               |         | Reference                 |         |
|                 | Nomal       | 0.58<br>(0.35,0.96)   | 0.033   | 0.49<br>(0.27,0.90)     | 0.022   | 0.75<br>(0.44,1.29)     | 0.301   | 0.35<br>(0.20,0.61)       | <0.001  |
|                 | Overweight  | 0.48<br>(0.28,0.83)   | 0.009   | 0.55<br>(0.30,0.99)     | 0.048   | 0.60<br>(0.34,1.06)     | 0.076   | 0.40<br>(0.23,0.71)       | 0.002   |
|                 | obese       | 0.49<br>(0.26,0.91)   | 0.024   | 0.47<br>(0.24,0.91)     | 0.026   | 0.56<br>(0.30,1.05)     | 0.070   | 0.34<br>(0.18,0.65)       | 0.001   |
| MACCEs          | underweight | Reference             |         | Reference               |         | Reference               |         | Reference                 |         |
|                 | Nomal       | 0.68<br>(0.49,0.94)   | 0.019   | 0.72<br>(0.51,1.01)     | 0.055   | 0.73<br>(0.53,1.01)     | 0.061   | 0.62<br>(0.44,0.86)       | 0.005   |
|                 | Overweight  | 0.82<br>(0.60,1.11)   | 0.200   | 0.68<br>(0.48,0.96)     | 0.029   | 0.73<br>(0.53,1.01)     | 0.060   | 0.72<br>(0.52,1.00)       | 0.052   |
|                 | obese       | 0.68<br>(0.48,0.98)   | 0.038   | 0.71<br>(0.49,1.02)     | 0.065   | 0.64<br>(0.45,0.91)     | 0.013   | 0.67<br>(0.47,0.97)       | 0.032   |

Adjusted for age, sex, hypertension, diabetes, LVEF, CRP and eGFR

**Table S3** Results of Subgroup Cox Regression Analyses Based on Median ALT and AST

| Outcomes        | Group       | ALT ≤ 20.1 U/L (n=843) |         | ALT > 20.1 U/L (n=820) |         | AST ≤ 21.3 U/L (n=845) |         | AST > 21.3 U/L (n=818) |         |
|-----------------|-------------|------------------------|---------|------------------------|---------|------------------------|---------|------------------------|---------|
|                 |             | HR(95%CI)              | p Value |
| All-cause death | underweight | Reference              |         | Reference              |         | Reference              |         | Reference              |         |
|                 | Nomal       | 0.42<br>(0.26,0.69)    | <0.001  | 0.70<br>(0.43,1.15)    | 0.163   | 0.46<br>(0.28,0.75)    | 0.002   | 0.67<br>(0.41,1.09)    | 0.109   |
|                 | Overweight  | 0.50<br>(0.31,0.81)    | 0.005   | 0.52<br>(0.30,0.88)    | 0.016   | 0.45<br>(0.27,0.72)    | 0.001   | 0.59<br>(0.35,1.00)    | 0.052   |
|                 | obese       | 0.36<br>(0.21,0.64)    | <0.001  | 0.63<br>(0.36,1.11)    | 0.109   | 0.42<br>(0.24,0.74)    | 0.003   | 0.53<br>(0.30,0.94)    | 0.029   |
| CV death        | underweight | Reference              |         | Reference              |         | Reference              |         | Reference              |         |
|                 | Nomal       | 0.53<br>(0.31,0.91)    | 0.021   | 0.72<br>(0.45,1.16)    | 0.178   | 0.48<br>(0.28,0.83)    | 0.009   | 0.59<br>(0.34,1.04)    | 0.069   |
|                 | Overweight  | 0.48<br>(0.35,1.03)    | 0.063   | 0.52<br>(0.31,0.87)    | 0.013   | 0.41<br>(0.23,0.72)    | 0.002   | 0.64<br>(0.36,1.13)    | 0.122   |
|                 | obese       | 0.35<br>(0.18,0.69)    | 0.002   | 0.51<br>(0.30,0.86)    | 0.011   | 0.41<br>(0.22,0.77)    | 0.006   | 0.53<br>(0.28,1.01)    | 0.053   |
| MACCEs          | underweight | Reference              |         | Reference              |         | Reference              |         | Reference              |         |
|                 | Nomal       | 0.56<br>(0.40,0.79)    | <0.001  | 0.85<br>(0.61,1.17)    | 0.322   | 0.67<br>(0.48,0.93)    | 0.017   | 0.72<br>(0.52,1.01)    | 0.056   |
|                 | Overweight  | 0.79<br>(0.58,1.09)    | 0.148   | 0.71<br>(0.50,0.99)    | 0.047   | 0.74<br>(0.54,1.02)    | 0.064   | 0.76<br>(0.54,1.07)    | 0.112   |
|                 | obese       | 0.53<br>(0.37,0.78)    | <0.001  | 0.89<br>(0.63,1.27)    | 0.527   | 0.69<br>(0.48,0.99)    | 0.041   | 0.68<br>(0.47,0.98)    | 0.040   |

Adjusted for age, sex, hypertension, diabetes, LVEF, CRP and eGFR

**Table S4 Results of Subgroup Cox Regression Analyses According to Comorbid Hyperlipidemia and Statin Use**

| Outcomes        | Group       | Hyperlipidemia (n=244) |         | NO Hyperlipidemia (n=1419) |         | Statins (n=1005)    |         | NO Statins (n=658)  |         |
|-----------------|-------------|------------------------|---------|----------------------------|---------|---------------------|---------|---------------------|---------|
|                 |             | HR(95%CI)              | p Value | HR(95%CI)                  | p Value | HR(95%CI)           | p Value | HR(95%CI)           | p Value |
| All-cause death | underweight | Reference              |         | Reference                  |         | Reference           |         | Reference           |         |
|                 | Nomal       | 2.49<br>(0.50,12.33)   | 0.264   | 0.49<br>(0.34,0.70)        | <0.001  | 0.51<br>(0.32,0.82) | 0.005   | 0.58<br>(0.35,0.97) | 0.037   |
|                 | Overweight  | 1.69<br>(0.32,8.94)    | 0.534   | 0.49<br>(0.34,0.71)        | <0.001  | 0.47<br>(0.30,0.76) | 0.002   | 0.60<br>(0.34,1.06) | 0.077   |
|                 | obese       | 1.52<br>(0.28,8.24)    | 0.628   | 0.44<br>(0.29,0.67)        | <0.001  | 0.50<br>(0.30,0.85) | 0.010   | 0.39<br>(0.21,0.74) | 0.004   |
| CV death        | underweight | Reference              |         | Reference                  |         | Reference           |         | Reference           |         |
|                 | Nomal       | 4.04<br>(0.47,34.48)   | 0.202   | 0.46<br>(0.31,0.70)        | <0.001  | 0.49<br>(0.28,0.84) | 0.009   | 0.58<br>(0.33,1.01) | 0.053   |
|                 | Overweight  | 2.54<br>(0.28,23.03)   | 0.407   | 0.49<br>(0.32,0.75)        | <0.001  | 0.49<br>(0.29,0.84) | 0.010   | 0.59<br>(0.32,1.09) | 0.092   |
|                 | obese       | 2.27<br>(0.25,20.74)   | 0.467   | 0.43<br>(0.27,0.70)        | <0.001  | 0.56<br>(0.31,1.01) | 0.054   | 0.36<br>(0.18,0.72) | 0.004   |
| MACCEs          | underweight | Reference              |         | Reference                  |         | Reference           |         | Reference           |         |
|                 | Nomal       | 0.80<br>(0.30,2.10)    | 0.650   | 0.50<br>(0.35,0.71)        | <0.001  | 0.64<br>(0.47,0.88) | 0.006   | 0.79<br>(0.55,1.12) | 0.183   |
|                 | Overweight  | 1.11<br>(0.49,2.51)    | 0.809   | 0.50<br>(0.35,0.71)        | <0.001  | 0.80<br>(0.60,1.07) | 0.135   | 0.67<br>(0.44,1.00) | 0.051   |
|                 | obese       | 1.36<br>(0.60,3.08)    | 0.457   | 0.38<br>(0.26,0.57)        | <0.001  | 0.70<br>(0.50,0.98) | 0.037   | 0.64<br>(0.43,0.96) | 0.031   |

Adjusted for age, sex, hypertension, diabetes, LVEF, CRP and eGFR

**Table S5** Results of Cox Regression Analyses after adjusting for other confounders

| Outcomes        | Group       | Events(n,%) | Model 1 <sup>a</sup> |         | Model 2 <sup>b</sup> |         | Model 3 <sup>c</sup> |         |
|-----------------|-------------|-------------|----------------------|---------|----------------------|---------|----------------------|---------|
|                 |             |             | HR(95%CI)            | p Value | HR(95%CI)            | p Value | HR(95%CI)            | p Value |
| All-cause death | underweight | 91(21.9)    | Reference            |         | Reference            |         | Reference            |         |
|                 | Nomal       | 53(12.8)    | 0.57<br>(0.40, 0.80) | 0.001   | 0.56<br>(0.39,0.79)  | 0.001   | 0.57<br>(0.40,0.82)  | 0.003   |
|                 | Overweight  | 49(11.7)    | 0.54<br>(0.38,0.78)  | <0.001  | 0.51<br>(0.36,0.74)  | <0.001  | 0.61<br>(0.42,0.90)  | 0.011   |
|                 | obese       | 38(9.1)     | 0.47<br>(0.31,0.70)  | <0.001  | 0.42<br>(0.28,0.63)  | <0.001  | 0.45<br>(0.30,0.68)  | <0.001  |
| CV death        | underweight | 73(17.6)    | Reference            |         | Reference            |         | Reference            |         |
|                 | Nomal       | 41(9.9)     | 0.55<br>(0.37,0.81)  | 0.003   | 0.54<br>(0.36,0.81)  | 0.003   | 0.58<br>(0.38,0.88)  | 0.010   |
|                 | Overweight  | 39(9.3)     | 0.55<br>(0.37,0.83)  | 0.004   | 0.54<br>(0.36,0.81)  | 0.003   | 0.67<br>(0.44,1.03)  | 0.065   |
|                 | obese       | 30(7.2)     | 0.46<br>(0.29,0.73)  | <0.001  | 0.41<br>(0.26,0.65)  | <0.001  | 0.46<br>(0.29,0.73)  | <0.001  |
| MACCEs          | underweight | 171(41.2)   | Reference            |         | Reference            |         | Reference            |         |
|                 | Nomal       | 124(30.0)   | 0.71<br>(0.56,0.90)  | 0.005   | 0.70<br>(0.55,0.88)  | 0.003   | 0.70<br>(0.55,0.89)  | 0.004   |
|                 | Overweight  | 136(32.5)   | 0.78<br>(0.62,0.99)  | 0.041   | 0.76<br>(0.60,0.96)  | 0.023   | 0.81<br>(0.64,1.04)  | 0.094   |
|                 | obese       | 107(25.7)   | 0.69<br>(0.53,0.89)  | 0.005   | 0.64<br>(0.49,0.83)  | <0.001  | 0.65<br>(0.50,0.85)  | 0.002   |

Model 1: Adjusted for age, sex, hypertension, diabetes, LVEF, CRP, eGFR, HR, DBP and NYHA Class

Model 2: Adjusted Model 1 +LAD、LDH、TP、ALB/GLB、UA、Cr、Ca、Cl、GRA、RBC、HGB、PLT and HbA1c

Model 3: Adjusted Model 2 +AF、ACEI/ARB/ARIN、SGLT2i、Beta-blocker、MRA、Diuretic and Digoxin

**Table S6** Results of mediation effects analysis of TG in different heart failure patients groups

| Group                     | Events(n,%) | All-cause death                |          | CV death                       |          | MACCEs                         |          |
|---------------------------|-------------|--------------------------------|----------|--------------------------------|----------|--------------------------------|----------|
|                           |             | Percentage of mediation effect | P value  | Percentage of mediation effect | P value  | Percentage of mediation effect | P value  |
| HFrEF+HFmrEF <sup>a</sup> | 1211 (72.8) | 10.5 (3.3,28.7)                | 0.0197** | 12.8 (4.2,33.0)                | 0.0128** | 13.3 (4.0,36.0)                | 0.0154** |
| HFpEF <sup>a</sup>        | 452 (27.2)  | 2.6 (0.0,82.9)                 | 0.3483   | —                              | —        | 6.5 (0.3,63.4)                 | 0.2577   |
| No MI <sup>b</sup>        | 1442 (86.7) | 3.8 (1.0,13.8)                 | 0.0666*  | 4.4 (1.2,14.7)                 | 0.0575*  | 5.7 (1.4,20.4)                 | 0.0601*  |
| With MI <sup>b</sup>      | 221 (13.3)  | 68.3 (0.1,100.0)               | 0.0567   | —                              | —        | —                              | —        |

\* p<0.1, \*\* p<0.05

a: adjusted for age, sex, hypertension, DM , eGFR, CRP

b: adjusted for age, sex, LVEF, hypertension, DM , eGFR, CRP

**Table S7 Results of Subgroup Cox Regression Analyses Between HFrEF+HFmrEF and HFpEF**

| Outcomes        | Group       | HFrEF+HFmrEF (n=1211) |          | HFpEF (n=452)     |          |
|-----------------|-------------|-----------------------|----------|-------------------|----------|
|                 |             | HR(95%CI)             | p Value  | HR(95%CI)         | p Value  |
| All-cause death | Underweight | Reference             |          | Reference         |          |
|                 | Normal      | 0.62 (0.42, 0.92)     | 0.017*   | 0.55 (0.27, 1.12) | 0.001*   |
|                 | Overweight  | 0.48 (0.32, 0.73)     | <0.001** | 0.64 (0.32, 1.28) | <0.001** |
|                 | Obese       | 0.58 (0.38, 0.91)     | 0.016*   | 0.32 (0.12, 0.82) | <0.001** |
| CV death        | Underweight | Reference             |          | Reference         |          |
|                 | Normal      | 0.60 (0.39, 0.93)     | 0.021*   | 0.53 (0.22, 1.25) | 0.146    |
|                 | Overweight  | 0.49 (0.31, 0.77)     | 0.002*   | 0.65 (0.28, 1.48) | 0.306    |
|                 | Obese       | 0.57 (0.35, 0.93)     | 0.025*   | 0.29 (0.09, 0.91) | 0.035*   |
| MACCEs          | Underweight | Reference             |          | Reference         |          |
|                 | Normal      | 0.75 (0.57, 0.97)     | 0.030*   | 0.64 (0.39, 1.05) | 0.075    |
|                 | Overweight  | 0.69 (0.53, 0.91)     | 0.008*   | 0.99 (0.63, 1.55) | 0.965    |
|                 | Obese       | 0.69 (0.52, 0.93)     | 0.015*   | 0.77 (0.47, 1.28) | 0.316    |

\* p<0.05

\*\* p<0.001

Adjusted for age, sex, hypertension, diabetes, CRP and eGFR
